# Supplementary material
Source: Springer Nature journal article supplement (https://www.springermedizin.de/resource/supplementary/13023_2012_527_MOESM6_ESM.pdf/9642298)
Supplement: MOESM6 [file 9642298]

1 CQCEPGFQLGPNNRSCV **DVNECDMGAPCEQRCFN**SYG TFLCRCHQGYELHRDGF**SCS** DIDE  
 2 CQCEPGFQLGPNNRSCV **DVNECDMGAPCEQRCFN**SYG TFLCRCHQGYELHRDGF**SCS** DIDE  
 3 CQCEPGFQLGPNNRSCV **DVNECDMGAPCEQRCFN**SYG TFLCRCHQGYELHRDGF**SCN** DIDE  
 4 CQCEPGFQLGPNNRSCV **DVNECDMGAPCEQRCFN**SYG TFLCRCHQGYELHRDGF**SCS** DIDE  
 5 CQCEPGFQLGPNNRSCV **DVNECDMGAPCEQRCFN**SYG TFLCR**CN**QGYELHRDGF**SCS** DIDE  
 6 CQCEPGFQLAGNNRSCV **DVDECGMGAPCSQWYNT**YG TFLCR**CE**QGYEL**EPDGRAN** DIDE

A

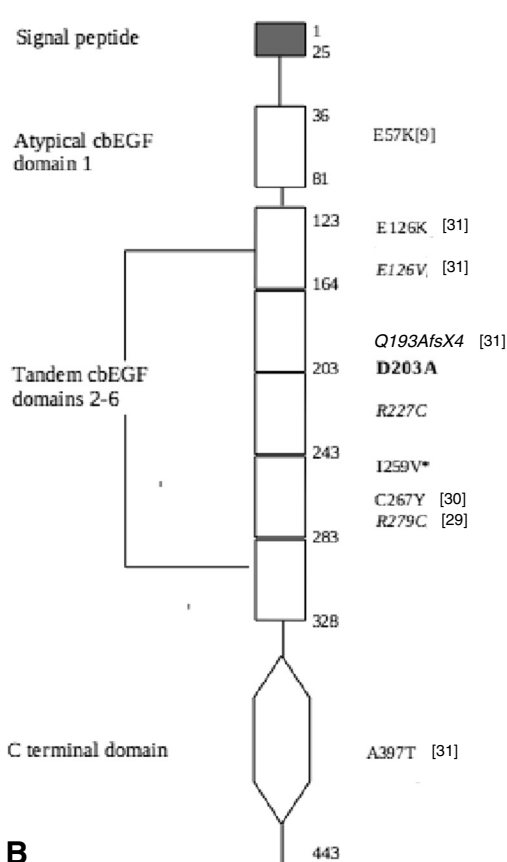

B
